# Supplementary material
Source: HighWire-hosted journal article supplement (http://www.cmajopen.ca/highwire/filestream/89847/field_highwire_adjunct_files/0/open-2022-0139-1-at.pdf)
Supplement: open-2022-0139-1-at.pdf [file open-2022-0139-1-at.pdf]

Appendix 1:

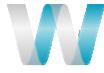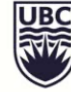

# Having a Baby?

We need your help to understand what values and information matters when making treatment decisions in pregnancy.

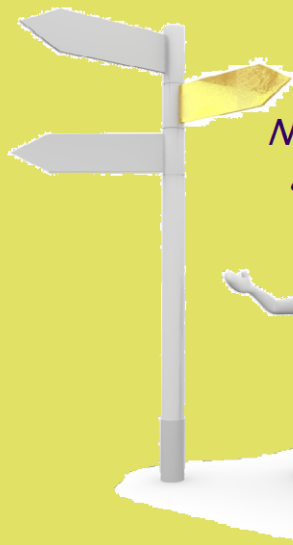

*Navigating the grey zone: Creating a decision aid for antenatal corticosteroids after 34 weeks gestation*

### WHO CAN PARTICIPATE?

- Pregnant women
- Obstetricians and pediatricians

### QUESTIONS OR WANT TO PARTICIPATE?

- Contact us at [decisionaid@cw.bc.ca](mailto:decisionaid@cw.bc.ca)

Version April 2, 2019/ REB: H18-03721/ PI: J. Hutcheon

- Navigating the grey zone  
[decisionaid@cw.bc.ca](mailto:decisionaid@cw.bc.ca)

# Counselling patients about antenatal corticosteroids?

We need your help to understand how to make it easier for clinicians and patients to decide.

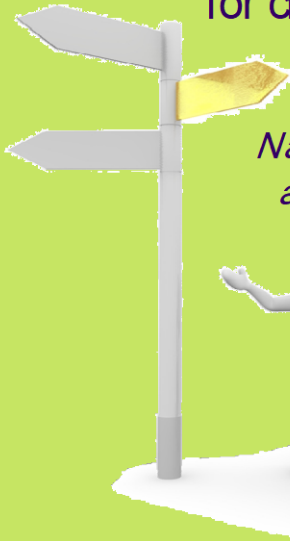

*Navigating the grey zone: Creating a decision aid for antenatal corticosteroids after 34 weeks' gestation*

## WHO CAN PARTICIPATE?

- Pregnant women
- Obstetricians and pediatricians

## QUESTIONS OR WANT TO PARTICIPATE?

- Contact us at [decisionaid@cw.bc.ca](mailto:decisionaid@cw.bc.ca)

Version April 2, 2019/ REB: H18-03721/ PI: J. Hutcheon

Navigating the grey zone  
[decisionaid@cw.bc.ca](mailto:decisionaid@cw.bc.ca)

Navigating the grey zone  
[decisionaid@cw.bc.ca](mailto:decisionaid@cw.bc.ca)
